# Supplementary material for: Flexible Piezoresistive Pressure Sensor Based on Electrospun Rough Polyurethane Nanofibers Film for Human Motion Monitoring
Source: MDPI journal article supplement (doi:10.3390/nano12040723), 2022-02-21
Supplement: s1 [file s1]

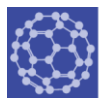

## Supplementary materials

# Flexible Piezoresistive Pressure Sensor Based on Electrospun Rough Polyurethane Nanofibers Film for Human Motion Monitoring

Bin Xue, Haiyi Xie, Jinxu Zhao, Jianming Zheng \* and Chunye Xu \*

Hefei National Laboratory for Physical Sciences at the Microscale, Department of Polymer Science and Engineering, University of Science and Technology of China, Hefei 230026, China;  
binxue@mail.ustc.edu.cn (B.X.); xiehy@mail.ustc.edu.cn (H.X.); zhaojinxu@mail.ustc.edu.cn (J.Z.)

\* Correspondence: jmz@ustc.edu.cn (J.Z.); chunye@ustc.edu.cn (C.X.)

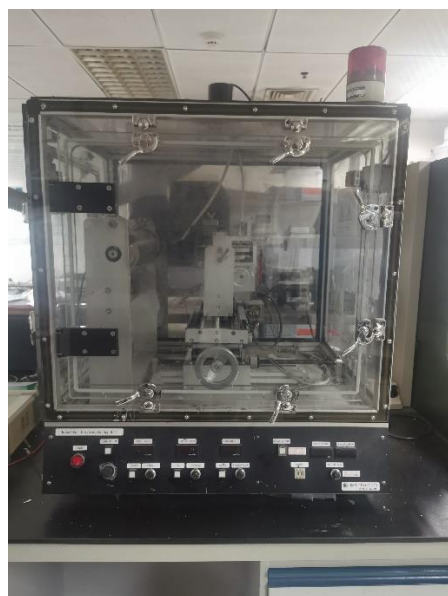

**Figure S1.** The photograph of the electrospinning unit.

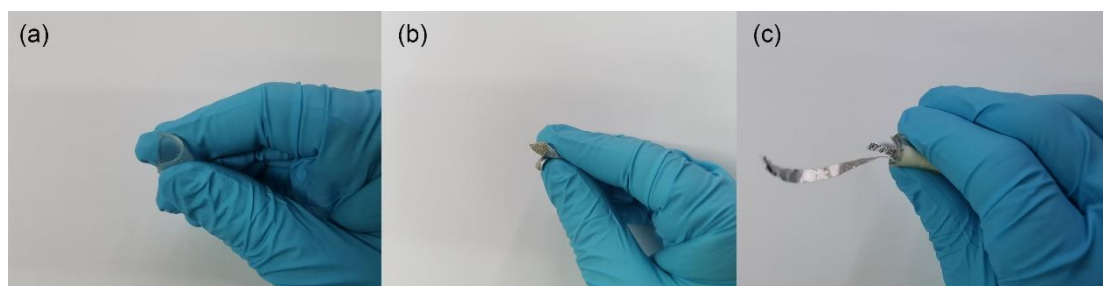

**Figure S2.** Photographs of (a) PDMS, (b) PU/Ag film, and (c) the fabricated piezoresistive pressure sensor at a bending state.

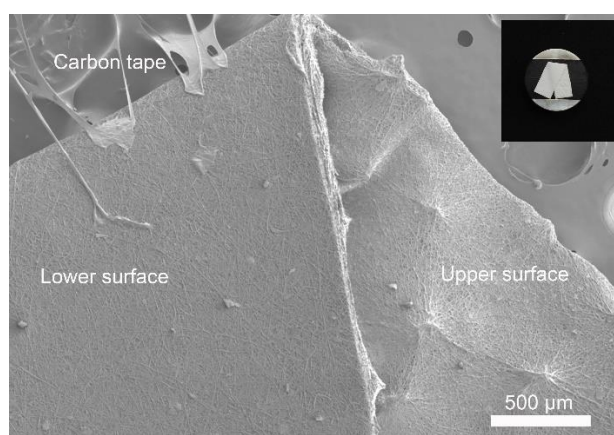

**Figure S3.** An SEM image of the electrospun PU nanofibers film. The inset is a photograph of the film fixed on the sample holder with carbon tape.

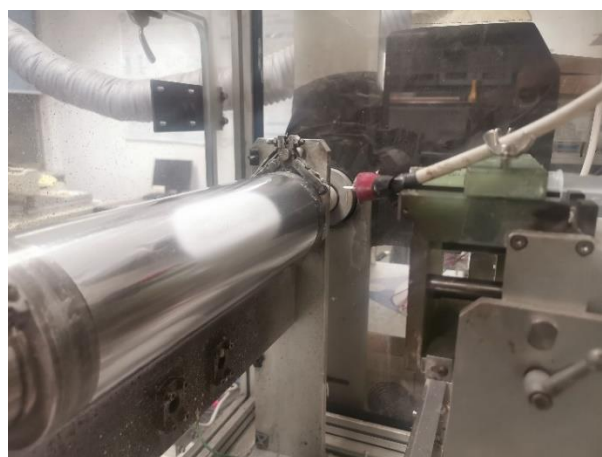

**Figure S4.** A photograph of the electrospun PU nanofibers film.

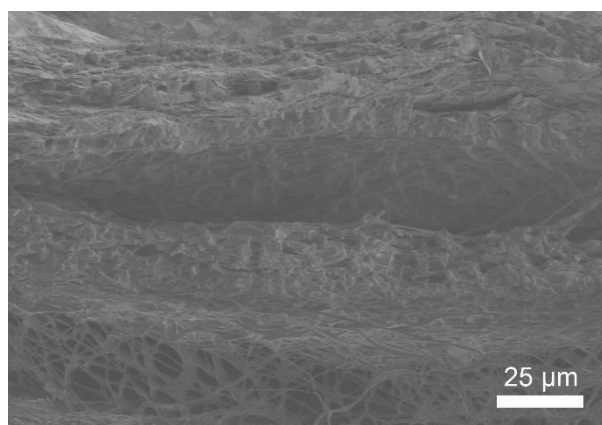

**Figure S5.** A high magnification cross-section SEM image of PU/Ag film.

**Table S1.** A comparison of other types of sensors reported recently with the proposed sensor.

| Active material                     | Sensing mechanism | Maximum sensitivity        | Stability                | Ref.      |
|-------------------------------------|-------------------|----------------------------|--------------------------|-----------|
| PI-MWCNTs/microstructured PDMS      | Capacitance       | 1.3 kPa <sup>-1</sup>      | > 4000 cycles            | [34]      |
| PDMS/PVDF BaTiO <sub>3</sub> filler | Capacitance       | 4.9 kPa <sup>-1</sup>      | 5000 cycles              | [35]      |
| PDMS                                | Capacitance       | 44.5 kPa <sup>-1</sup>     | 5000 cycles              | [36]      |
| ITO coated PET/porous PDMS          | Capacitance       | 0.095 kPa <sup>-1</sup>    | N/A                      | [37]      |
| porous PDMS/CNT film                | Capacitance       | 2.51 kPa <sup>-1</sup>     | 5000 cycles              | [38]      |
| BCZT/PDMS                           | Piezoelectric     | ~0.55 V kPa <sup>-1</sup>  | 2×10 <sup>6</sup> cycles | [39]      |
| Hierarchical ZnO NRs/PVDF           | Piezoelectric     | 11.07 mV kPa <sup>-1</sup> | 3600 cycles              | [40]      |
| ZnO@C/PVDF                          | Piezoelectric     | 0.98 V kPa <sup>-1</sup>   | 4000 cycles              | [41]      |
| MXene/PVDF hybrid film              | Piezoelectric     | 0.0480 V N <sup>-1</sup>   | N/A                      | [42]      |
| PDA@BTO/PVDF                        | Piezoelectric     | 0.38 V N <sup>-1</sup>     | 6834 cycles              | [43]      |
| Microstructured PU/Ag film          | Piezoresistive    | 10.53 kPa <sup>-1</sup>    | 10000 cycles             | This work |

## References

34. Chen, Y.; Zhang, P.; Li, Y.; Zhang, K.; Su, J.; Huang, L. Flexible capacitive pressure sensor based on multi-walled carbon nanotubes microstructure electrodes. *J. Phys. D Appl. Phys.* **2021**, *54*, 155101.
35. Ma, L.; Yu, X.; Yang, Y.; Hu, Y.; Zhang, X.; Li, H.; Ouyang, X.; Zhu, P.; Sun, R.; Wong, C.-p. Highly sensitive flexible capacitive pressure sensor with a broad linear response range and finite element analysis of micro-array electrode. *J. Mater.* **2020**, *6*, 321–329.
36. Yang, J.C.; Kim, J.O.; Oh, J.; Kwon, S.Y.; Sim, J.Y.; Kim, D.W.; Choi, H.B.; Park, S. Microstructured Porous Pyramid-Based Ultrahigh Sensitive Pressure Sensor Insensitive to Strain and Temperature. *ACS Appl. Mater. Interfaces* **2019**, *11*, 19472–19480.
37. Bijender; Kumar, A. Flexible and wearable capacitive pressure sensor for blood pressure monitoring. *Sens. Bio-Sens. Res.* **2021**, *33*, 100434.
38. Zhang, Z.; Gui, X.; Hu, Q.; Yang, L.; Yang, R.; Huang, B.; Yang, B.R.; Tang, Z. Highly Sensitive Capacitive Pressure Sensor Based on a Micropyramid Array for Health and Motion Monitoring. *Adv. Electron. Mater.* **2021**, *7*, 2100174.
39. Gao, X.; Zheng, M.; Yan, X.; Fu, J.; Zhu, M.; Hou, Y. The alignment of BCZT particles in PDMS boosts the sensitivity and cycling reliability of a flexible piezoelectric touch sensor. *J. Mater. Chem. C* **2019**, *7*, 961–967.
40. Feng, W.; Chen, Y.; Wang, W.; Yu, D. A waterproof and breathable textile pressure sensor with high sensitivity based on PVDF/ZnO hierarchical structure. *Colloids Surf. A* **2022**, *633*, 127890.
41. Li, X.; Ji, D.; Yu, B.; Ghosh, R.; He, J.; Qin, X.; Ramakrishna, S. Boosting piezoelectric and triboelectric effects of PVDF nanofiber through carbon-coated piezoelectric nanoparticles for highly sensitive wearable sensors. *Chem. Eng. J.* **2021**, *426*, 130345.
42. Zhao, Q.; Yang, L.; Ma, Y.; Huang, H.; He, H.; Ji, H.; Wang, Z.; Qiu, J. Highly sensitive, reliable and flexible pressure sensor based on piezoelectric PVDF hybrid film using MXene nanosheet reinforcement. *J. Alloys Compd.* **2021**, *886*, 161069.
43. Su, Y.; Li, W.; Yuan, L.; Chen, C.; Pan, H.; Xie, G.; Conta, G.; Ferrier, S.; Zhao, X.; Chen, G.; et al. Piezoelectric fiber composites with polydopamine interfacial layer for self-powered wearable biomonitoring. *Nano Energy* **2021**, *89*, 106321.
